# Supplementary material for: Towards continuous Rh-hydroformylation of long chain alkenes: handling methodology for the long-term stability of Biphephos in a continuous reactor with an attached membrane separation unit
Source: Royal Society of Chemistry journal article supplement (doi:10.1039/d4cy01148a), 2024-12-04
Supplement: d4cy01148a1.pdf [file d4cy01148a1.pdf]

**Towards continuous Rh-hydroformylation of long chain alkenes:  
Handling methodology for the long-term stability of Biphephos in a continuous reactor with an  
attached membrane separation unit**

**Viktor Söderholm, Marc Stajer, Carolin Savage, Leon Splittgerber, Dieter Vogt**

*<sup>a</sup>Laboratory of Industrial Chemistry, Department of Biochemical and Chemical Engineering, Technical University of Dortmund,  
Emil-Figge-Str. 66, D-44227 Dortmund, Germany*

*\*Corresponding author: dieter.vogt@tu-dortmund.de*

---

**Supplementary Information**

**Table of contents:**

|                                                                                                                                                                  |      |
|------------------------------------------------------------------------------------------------------------------------------------------------------------------|------|
| SI 1: Different decomposition pathways of phosphite ligands                                                                                                      | p. 2 |
| SI 2: Catalytically active but unselective ligand decomposition products                                                                                         | p. 2 |
| SI 3: Mechanism through which the stabilizers stabilize Biphephos                                                                                                | p. 3 |
| SI 4: The purity of the Biphephos used                                                                                                                           | p. 4 |
| SI 5: A collection of selected publications on phosphite ligands used in Rh-catalysed hydroformylation and their various approaches to preparation methodologies | p. 4 |
| SI 6: Membrane part                                                                                                                                              | p. 7 |

## SI 1: Different decomposition pathways of phosphite ligands

There are several different decomposition pathways that phosphite ligands can undergo. An overview of the most important phosphite decomposition reactions is presented in Figure 1.

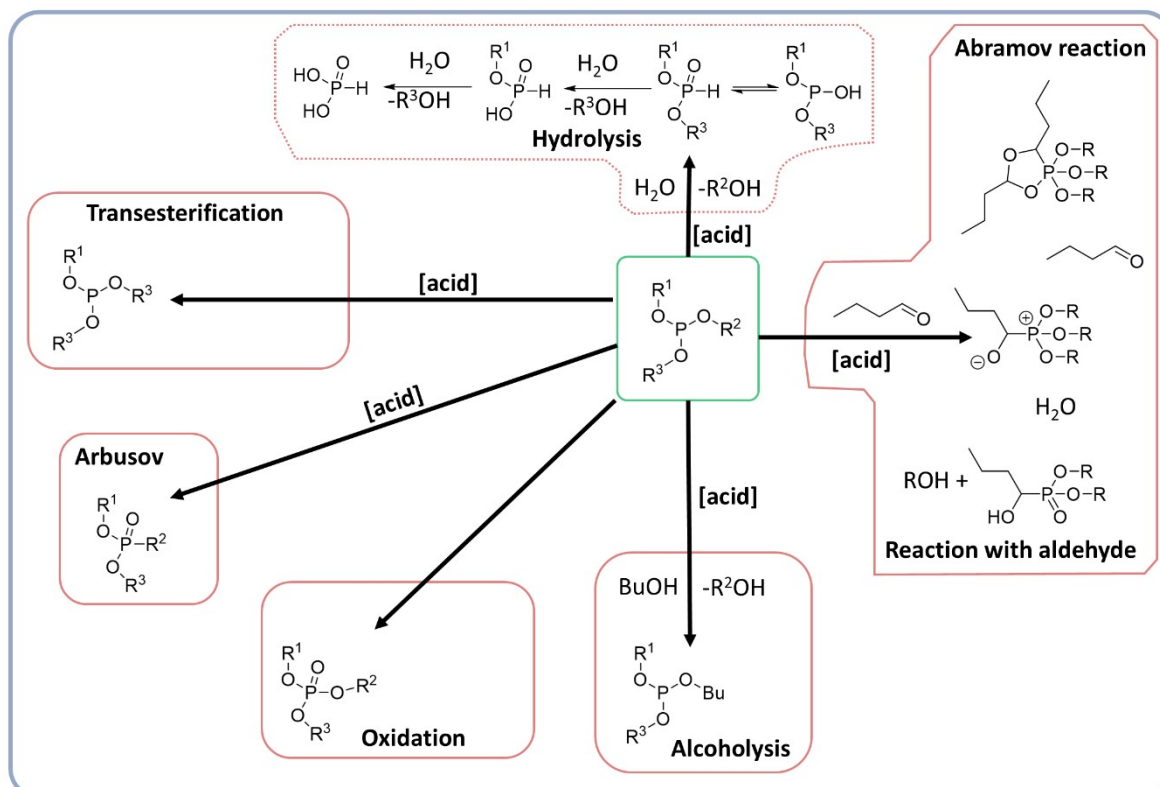

Figure 1: Decomposition pathways of phosphites include hydrolysis, alcoholysis, trans-esterification, Arbusov rearrangement and reaction with aldehydes (Abramov reaction). All these decomposition reactions are catalysed by strong and weak acids.

The decomposition reactions that phosphites can undergo include hydrolysis, alcoholysis, trans-esterification and Arbusov rearrangement.<sup>1</sup> But when phosphites are applied as ligands in hydroformylation their susceptibility to perform nucleophilic attack on aldehydes (Abramov reaction) must also be considered.<sup>2</sup>

## SI 2: Catalytically active but unselective ligand decomposition products

The pentavalent phosphorus species formed from the hydrolysis are also known as pentavalent heteroatom-substituted phosphine oxide (HASPO). A HASPO can rearrange and form trivalent phosphoric compounds which have ligating capabilities, see Figure 2. The two type of species exist in a tautomeric equilibrium with each other.

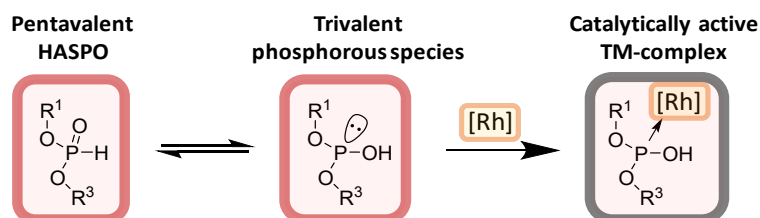

Figure 2: A phosphonic acid diester is a pentavalent phosphoric species, also known as a pentavalent heteroatom-substituted phosphine oxide (HASPO). It is in an equilibrium with a trivalent species that has coordinating abilities. This trivalent species can therefore coordinate to a metal, e.g. rhodium.

Trivalent HASPOs have been studied as ligands in various catalytic systems,<sup>3,4,5,6,7,8,9,10,11</sup> including Rh-catalysed hydroformylation.<sup>12,13</sup> They form Rh-complexes that are highly active in hydroformylation, but without any selectivity. Thus, the expectations of the catalyst system based on the initially applied phosphite ligand will become increasingly tainted when HASPOs accumulate in the reaction mixture.

### SI 3: Mechanism through which the stabilizers stabilize Biphephos

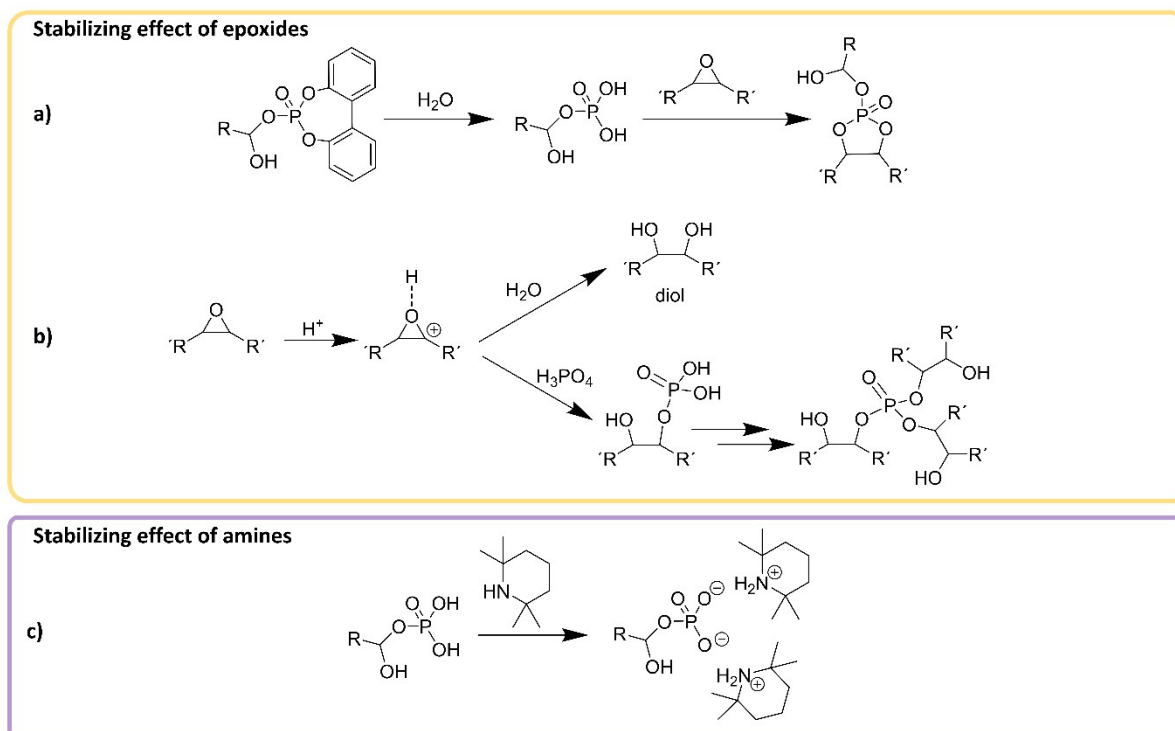

Figure 3: The mechanism through which the stabilizers stabilize Biphephos by scavenging acids that are formed

The epoxide stabilizers will scavenge any phosphorus acid formed from hydrolysis of Biphephos. This happens either by reacting with the aldehyde acid to form a cyclic adduct according to a) in Figure 3 above.<sup>14</sup> Or reacting with phosphonic acids according to b) in Figure 3 above.<sup>15-17</sup> There were no evidence of the epoxide stabilizer CHO causing any oxidation of the Biphephos during the experiments performed for this paper. Epoxides are known to have the potential to oxidize phosphites.<sup>18</sup> A reason for the lack of reaction can be the sterically bulky groups around the phosphor atoms of the Biphephos, which provide little chance for that epoxide access the phosphor. Only after the Biphephos has been hydrolysed there would be an opening for the epoxide to access the phosphor. Amines like the stabilizer TMP will scavenge acids by forming salts with them according to c) in Figure 3 above.<sup>19</sup>

#### SI 4: The purity of the Biphephos used

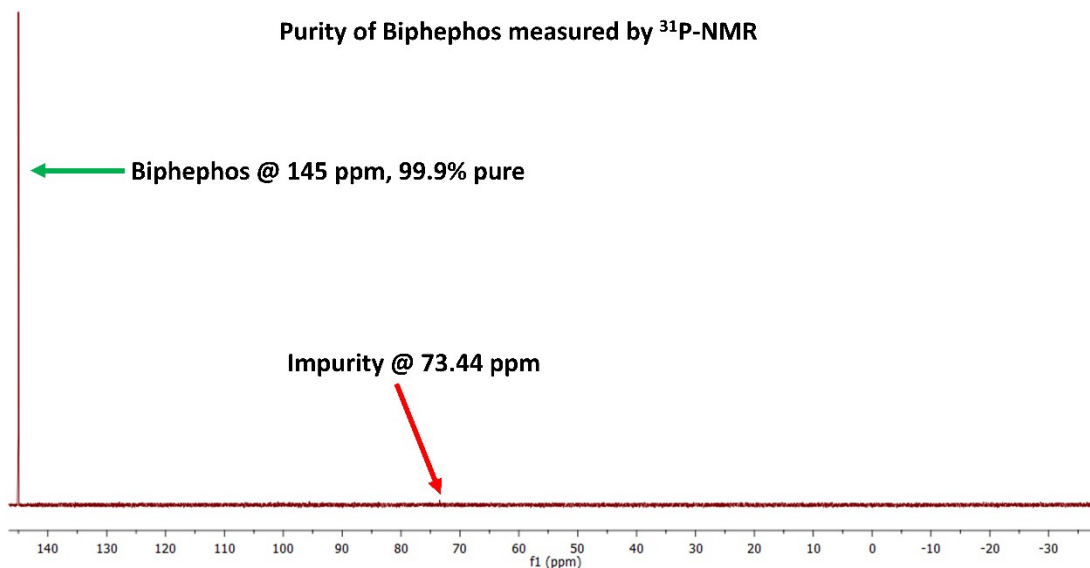

Figure 4: The purity of Biphephos was determined to be 99.9% pure according to <sup>31</sup>P-NMR measured in *d*-Toluene.

The purity of Biphephos was measured by <sup>31</sup>P-NMR. It is important to prepare the sample using a non-chlorinated deuterated solvent as chlorinated solvents such as CDCl<sub>3</sub> has the potential to contain small but significant amounts of HCl due to the solvent decomposition.

#### SI 5: A collection of selected publications on phosphite ligands used in Rh-catalysed hydroformylation and their various approaches to preparation methodologies

Table 2: Reports on phosphite-based catalytic systems and measures taken during the reaction preparation.

| Ligand                        | Year | Type  | Cat. sol. prep method                   | Purified substrate       | Final inert gas flush / PDP-cycles | Stabilizers     | Ref. |
|-------------------------------|------|-------|-----------------------------------------|--------------------------|------------------------------------|-----------------|------|
| Monodentate phosphite         | 1983 | Batch | Unknown                                 | Percolation over alumina | No                                 | No              | 20   |
| Monodentate phosphite         | 1985 | Batch | Unknown                                 | No                       | Yes, one cycle                     | No              | 21   |
| Monodentate phosphite         | 1985 | Cont. | Unknown                                 | No                       | Yes                                | No              |      |
| Monodentate phosphite         | 1986 | Batch | Unknown                                 | No                       | No                                 | Tertiary amines | 22   |
| Biphephos                     | 1987 | Batch | Simultaneous solvation of Rh and ligand | No                       | Yes, one cycle                     | No              | 23   |
| Biphephos                     | 1987 | Cont. | Simultaneous solvation of Rh and ligand | No                       | Yes                                | No              |      |
| Biphephos                     | 1988 | Batch | Simultaneous solvation of Rh and ligand | No                       | Yes, one cycle                     | No              | 24   |
| Biphephos                     | 1988 | Cont. | Unknown                                 | No                       | Yes                                | Amberlyst -A-21 |      |
| Polymer bound phosphite       | 1992 | Batch | Unknown                                 | No                       | No                                 | No              | 25   |
| Heterogenized bulky phosphite | 1993 | Batch | Unknown                                 | No                       | No                                 | No              | 26   |
| Biphephos                     | 1993 | Batch | Simultaneous                            | No                       | Yes                                | No              | 27   |

|                          |      |       |                                         |                          |                |                 |    |
|--------------------------|------|-------|-----------------------------------------|--------------------------|----------------|-----------------|----|
|                          |      |       | solvation of Rh and ligand              |                          |                |                 |    |
| Biphephos                | 1994 | Cont. | Unknown                                 | No                       | Yes            | epoxides        | 28 |
| Biphephos                | 1996 | Batch | Simultaneous solvation of Rh and ligand | No                       | No             | No              | 29 |
| Biphephos type           | 1999 | Batch | Separate solvation of Rh and ligand     | Freshly distilled        | No             | No              | 30 |
| Phosphane-phosphite      | 1999 | Batch | Simultaneous solvation of Rh and ligand | No                       | No             | No              | 31 |
| Biphephos                | 2003 | Batch | Simultaneous solvation of Rh and ligand | No                       | No             | No              | 32 |
| Biphephos                | 2003 | Batch | Unknown                                 | Freshly distilled        | No             | No              | 33 |
| POSSphites               | 2004 | Batch | Separate solvation of Rh and ligand     | Percolation over alumina | No             | No              | 34 |
| Biphephos                | 2005 | Batch | Simultaneous solvation of Rh and ligand | No                       | No             | No              | 35 |
| Biphephos                | 2005 | Batch | Simultaneous solvation of Rh and ligand | No                       | No             | No              | 36 |
| Biphephos                | 2005 | Batch | Separate solvation of Rh and ligand     | No                       | Yes            | No              | 37 |
| POSSphites               | 2005 | Batch | Separate solvation of Rh and ligand     | No                       | No             | No              | 38 |
| JanaPhos                 | 2009 | Batch | Simultaneous solvation of Rh and ligand | No                       | No             | No              | 39 |
| Biphephos                | 2009 | Batch | Simultaneous solvation of Rh and ligand | No                       | No             | TMP derivatives | 40 |
| Biphephos                | 2011 | Cont. | Rh dissolved separately                 | No                       | Yes            | No              | 41 |
| Biphephos                | 2011 | Batch | Unknown                                 | No                       | No             | No              | 42 |
| Sulfonated calix[4]arene | 2011 | Batch | Separate solvation of Rh and ligand     | No                       | yes, one cycle | No              | 43 |
| JanaPhos                 | 2011 | Cont. | Simultaneous solvation of Rh and ligand | Freshly distilled        | No             | No              | 44 |
| Bulky phosphite          | 2013 | Batch | Simultaneous solvation of Rh and ligand | Percolation over alumina | Yes            | No              | 45 |
| Biphephos                | 2013 | Batch | Simultaneous solvation of Rh and ligand | No                       | No             | No              | 46 |
| Bulky phosphite          | 2014 | Batch | Unknown                                 | Percolation over alumina | No             | No              | 47 |
| Biphephos                | 2014 | Batch | Simultaneous solvation of Rh and ligand | No                       | No             | No              | 48 |
| Biphephos                | 2014 | Batch | Simultaneous solvation of Rh and ligand | No                       | No             | No              | 49 |
| Biphephos                | 2015 | Batch | Simultaneous solvation of Rh and ligand | No                       | No             | No              | 50 |
| Biphephos                | 2015 | Batch | Simultaneous solvation of Rh and ligand | No                       | No             | No              | 51 |
| Biphephos                | 2015 | Cont. | Rh dissolved                            | No                       | No             | Tinuvin         | 52 |

|                 |      |       |                                                    |                                             |                 |    |    |
|-----------------|------|-------|----------------------------------------------------|---------------------------------------------|-----------------|----|----|
|                 |      |       | separately                                         |                                             |                 |    |    |
| Biphephos       | 2016 | Batch | Simultaneous solvation of Rh and ligand            | No                                          | No              | No | 53 |
| Biphephos       | 2016 | Cont. | Unknown                                            | No                                          | No              | No | 54 |
| Biphephos       | 2017 | Batch | Simultaneous solvation of Rh and ligand            | No                                          | Yes             | No | 55 |
| Biphephos       | 2017 | Batch | Simultaneous solvation of Rh and ligand            | No                                          | No              | No | 56 |
| Biphephos       | 2018 | Batch | Rh dissolved separately                            | Percolation over alumina + vacuum distilled | No              | No | 57 |
| Biphephos       | 2018 | Batch | Simultaneous solvation of Rh and ligand            | No                                          | No              | No | 58 |
| Biphephos       | 2019 | Batch | Unknown                                            | No                                          | Yes             | No | 59 |
| Biphephos       | 2023 | Batch | Unknown                                            | Freshly distilled                           | Yes, 3 cycles   | No | 60 |
| Biphephos       | 2023 | Batch | Simultaneous solvation of Rh and ligand            | Freshly distilled                           | Purged 10 min   | No | 61 |
| Bulky phosphite | 2023 | Batch | Both simultaneous solvation and separate solvation | No alkenes included in experiments          | No <sup>1</sup> | No | 62 |

1 To have fully oxygen free conditions were not decisive for these experiments as there was no hydroformylation performed.

## SI 6: Membrane part

### SI 6.a: Chemicals used

Table 1: List of chemicals used.

| Substance                 | CAS         | Supplier       | Purity |
|---------------------------|-------------|----------------|--------|
| 1-Octene                  | 111-66-0    | Acros Organics | ≥ 99%  |
| Toluene                   | 108-88-3    | Acros Organics | ≥ 95%  |
| Cyclohexene oxide         | 286-20-4    | Acros Organics | 98%    |
| Rh(acac)(CO) <sub>2</sub> | 14874-82-9  | Alfa Aesar     | 99%    |
| Biphephos                 | 121627-17-6 | Molisa         | 97%    |
| Syngas                    | -           | Messer         | 5.0    |
| Argon                     | 7440-37-1   | Messer         | 3.8    |
| Nitrogen                  | 7727-37-9   | Messer         | 2.5    |

### SI 6.b: Membrane miniplant

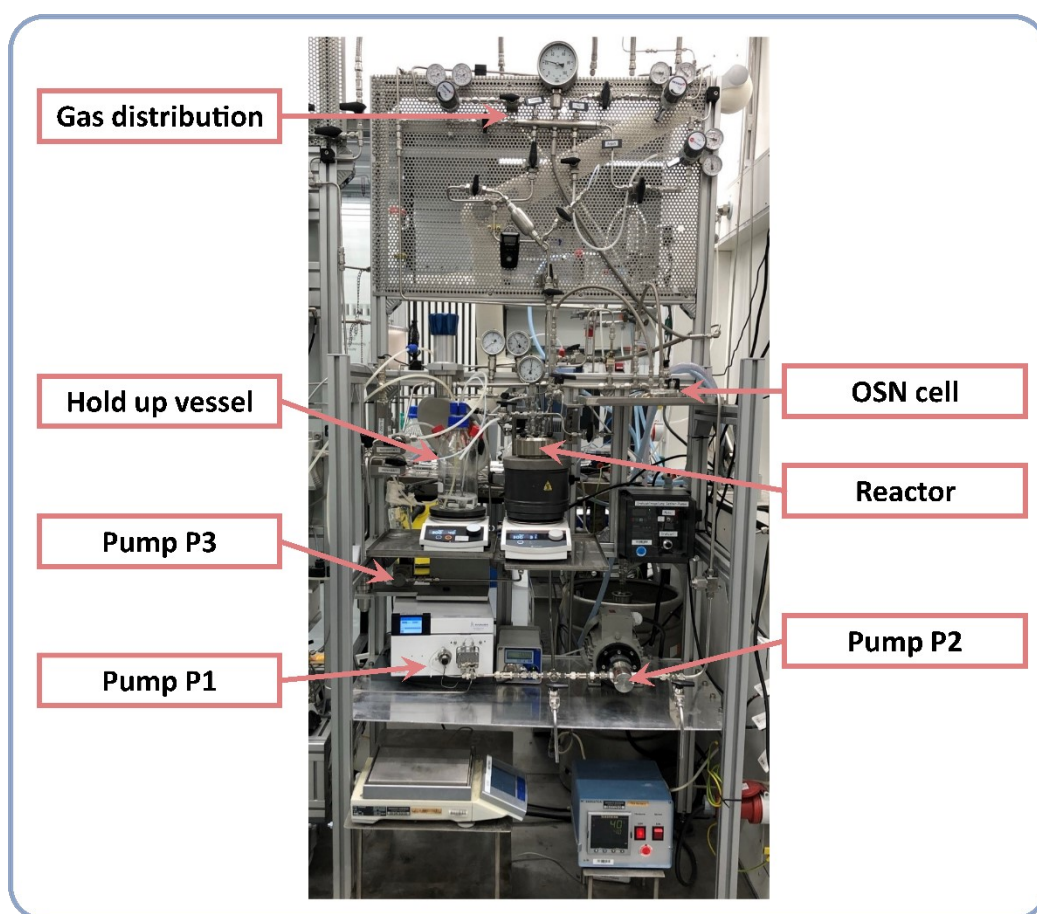

Figure 5: Photo of miniplant NEMO 2.0 with highlighted main components.

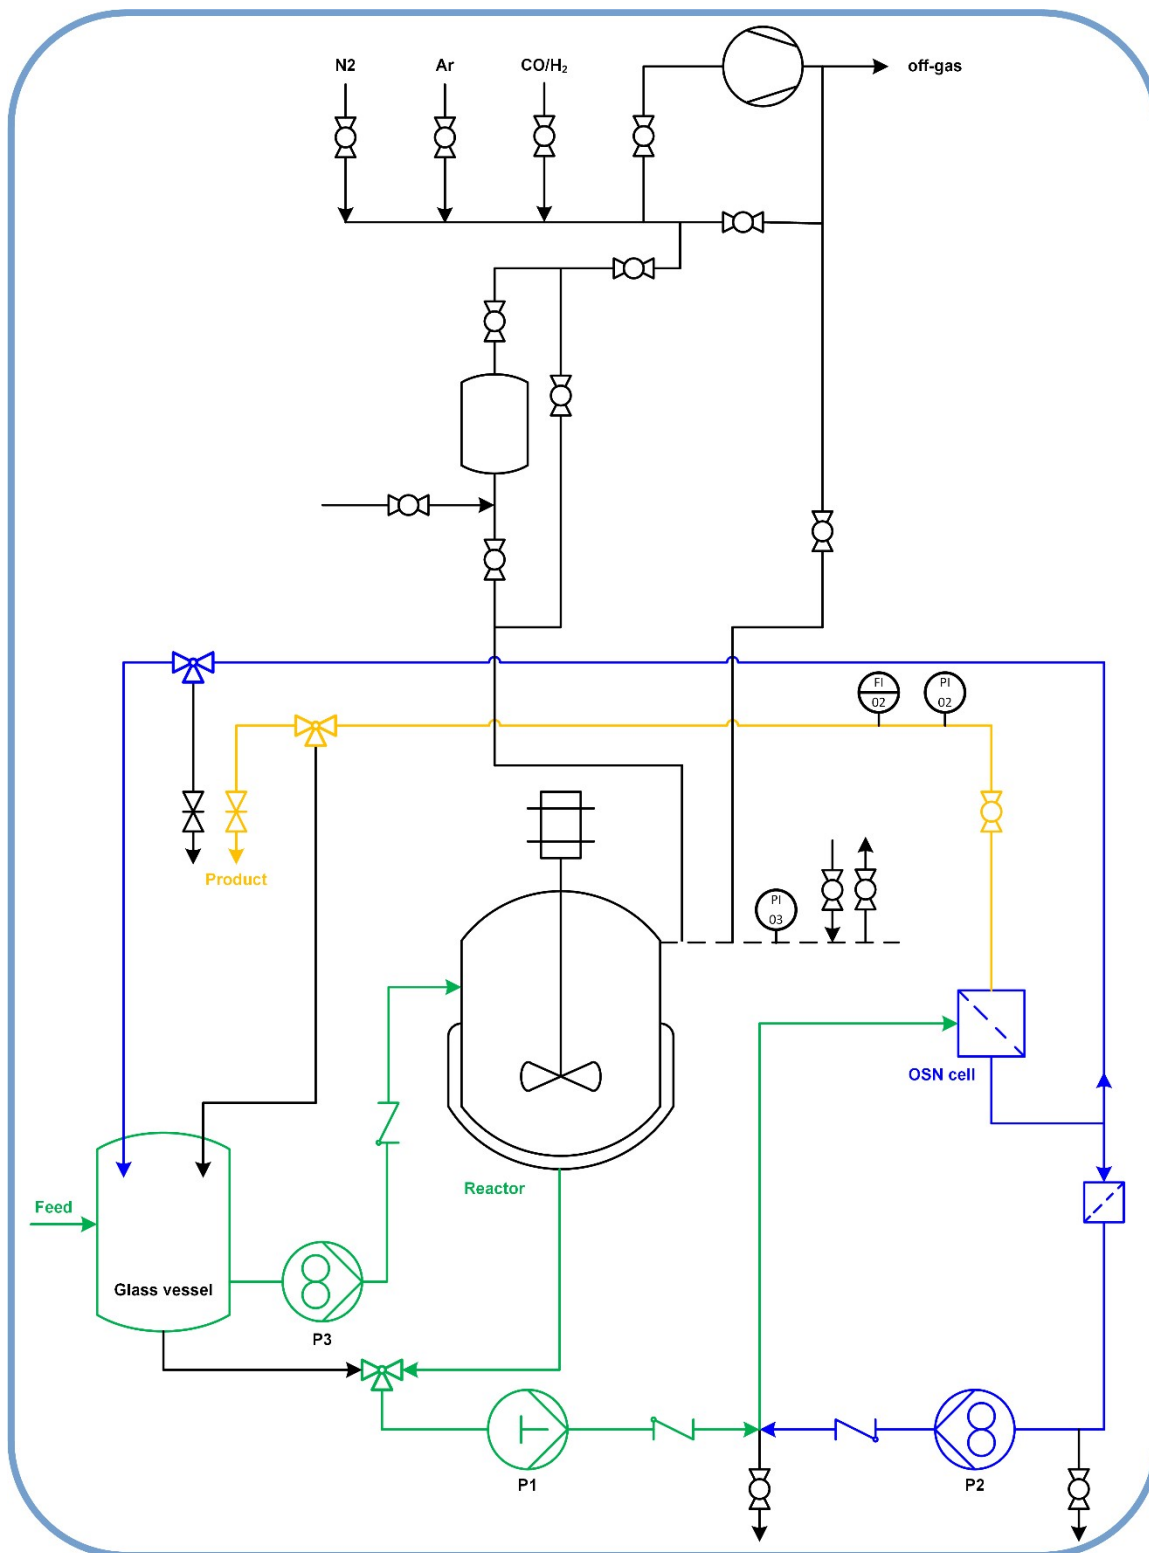

Figure 6: P&ID of NEMO 2.0. Reaction cycle (green), permeate (yellow) and retentate cycle (blue).



### SI 6.c: Membrane screening

The most significant outcome parameters for this pre-study were the retention of both the catalyst and the ligand to obtain a maximum of it inside of the reaction system and the flux through the membrane to receive as many exchanged reactor volumes as possible. For this reaction system the membranes in Table 2 were identified as suitable and available in our research group. All membranes are organic solvent nanofiltration membranes with different properties due to their chemical structure. The results indicated, that the membrane *SolSep BV NF030105* was the most suitable one for the long-term experiment due to a higher flux.

Table 2: Comparison of different membranes applied in NEMO 2.0. [Rh] and [P] measured after 2 h and 4 h via ICP-OES. Flux measured via mass flow indicator.

| OSN Membrane |                   | Retention [%] |    | Flux                                  |
|--------------|-------------------|---------------|----|---------------------------------------|
| Supplier     | Model             | Rh            | P  | [g cm <sup>-2</sup> h <sup>-1</sup> ] |
| SolSep BV    | NF030105          | 98            | 98 | 10                                    |
| Evonik       | PuraMem S600      | 84            | 84 | 5                                     |
| Evonik       | PuraMem 280       | 95            | 94 | 4                                     |
| Evonik       | PuraMem Selective | 99            | 98 | 6                                     |
| GMT          | oNF-2             | 87            | 81 | 8                                     |

### SI 6.d: Experimental for membrane screening

The procedure during the membrane selection was like the latter long-term experiment.

Preparation of the substrates: 1-octene was cleaned over Al<sub>2</sub>O<sub>3</sub>-column to remove traces of peroxides, toluene was cleaned over Al<sub>2</sub>O<sub>3</sub>-column to remove traces of water. The substrate solution was prepared by weighing out 1-octene (25 wt%) and toluene (75wt%) as well as CHO.

Preparation of the miniplant: miniplant incl. reactor, valves and glassware was cleansed with acetone to remove any residues in the pipes and afterwards with toluene to remove any acetone. Three PDP-cycles were applied (2x nitrogen (<10 bar), 1x argon, each followed by vacuum to remove any air and low boiling solvents).

Preparation of the membrane: cutting flat-sheet membrane, insertion of membrane in membrane module (2,5" MET-cell), low pressure argon flushing of the module, connection to miniplant. Further flushing of miniplant with nitrogen (<2 bar) and argon (< 2 bar) to remove further air. Filling in toluene and 1-octene for conditioning of membrane (each according to the supplier, around 4 h total; reactor: T = 40 °C, p = 20 bar; membrane part: T = 40 °C, Δp = 40 bar; glass flask: T = 40 °C, p = 1 bar, stripped with argon).

Preparation of Catalyst, BP and CHO: Solving of Biphephos (1,87 g) and CHO (1,86 g) in toluene (50 ml) as well as solving of Rh (112 mg) in toluene (50 ml) in a separate flask in ultrasonic bath under argon stream. Inserting both mixtures into the reactor via gear pump (both flasks are topped with argon). Preforming for 1 h (T = 40 °C, p = 20 bar).

Start-up for screening run: HPLC pump starts to feed the membrane cycle (Time = 0) and the other pump is starting to feed the reactor from the glass flask again. Applying syngas to the reactor (20 bar). Both permeate and retentate were collected in the glass flask and stayed within the system. Samples were taken after 2 and 4 h of experiment and measured via ICP-OES. Flux was measured via mass flow indicator.

SI 6.e: Long-term experiment

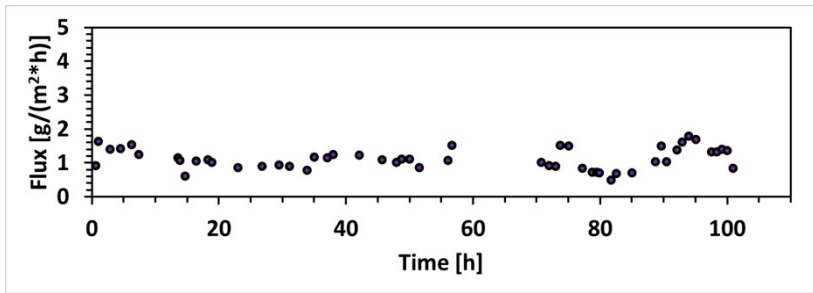

Figure 7: Flux over time during long-term miniplant experiment. Measured via balance.

Table 3: Concentration and retention of rhodium and phosphorus over time and sample measured by ICP-OES.

| Sample    | Time [h] | c_Rh [ppm] | c_P [ppm] | R_Rh | R_P |
|-----------|----------|------------|-----------|------|-----|
| Permeate  | 5        | 11         | 46        |      |     |
| Permeate  | 6        | 10         | 47        |      |     |
| Permeate  | 7        | 11         | 47        |      |     |
| Permeate  | 14       | 10         | 43        |      |     |
| Permeate  | 23       | 9          | 40        | 96%  | 95% |
| Retentate | 23       | 203        | 730       |      |     |
| Permeate  | 27       | 12         | 47        |      |     |
| Permeate  | 31       | 11         | 43        |      |     |
| Permeate  | 35       | 10         | 36        | 93%  | 94% |
| Retentate | 35       | 152        | 578       |      |     |
| Permeate  | 42       | 9          | 34        |      |     |
| Permeate  | 46       | 9          | 34        |      |     |
| Permeate  | 50       | 9          | 32        | 94%  | 94% |
| Retentate | 50       | 145        | 542       |      |     |
| Permeate  | 56       | 8          | 31        |      |     |
| Permeate  | 72       | 7          | 27        | 99%  | 83% |
| Retentate | 72       | 721        | 155       |      |     |
| Permeate  | 80       | 7          | 25        |      |     |
| Permeate  | 85       | 7          | 27        |      |     |
| Permeate  | 90       | 4          | 16        | 94%  | 91% |
| Retentate | 90       | 64         | 187       |      |     |
| Permeate  | 95       | 3          | 11        |      |     |
| Permeate  | 100      | 3          | 10        | 93%  | 91% |
| Retentate | 100      | 40         | 110       |      |     |
| Permeate  | 102      | 3          | 6         |      |     |
| Permeate  | 104      | 5          | 5         |      |     |

#### SI 6.f: Membrane experiment with TINUVIN 770

The experiment had to be determined, due to a decrease in flux. TINUVIN 770 is prone to precipitation and clogged the filter upstream of the membrane (s. Figure 6).

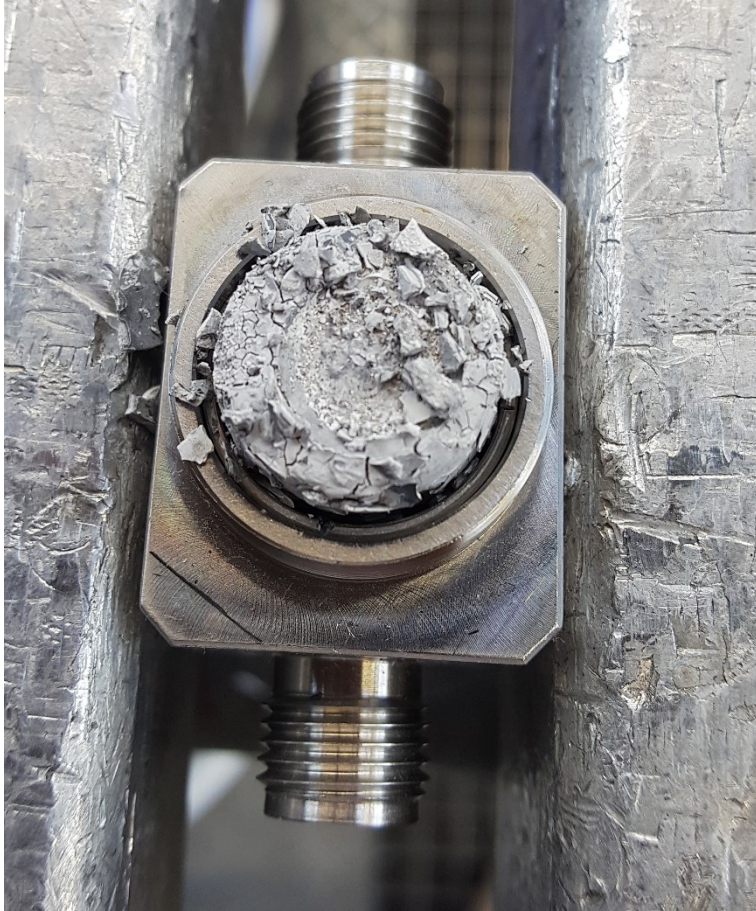

Figure 8: Clogged filter with precipitated TINUVIN 770 (taken from pre-experiments).

- 1 P. W. N. M. Van Leeuwen, *Appl. Catal., A*, 2001, **212**, 61–81.
- 2 E. Billig, A. G. Abatjoglou, D. R. Bryant, R. E. Murray, J. M. Maher, (*Union Carbide Corporation*) *US4789753*, **1988**.
- 3 L. Ackermann, *Synthesis*, 2006, **8**, 1557–1571.
- 4 L. Ackermann, *Pure Appl. Chem.*, 2010, **82**, 1403–1413.
- 5 H. Landert, F. Spindler, A. Wyss, H. U. Blaser, B. Pugin, Y. Ribourduoille, B. Gschwend, B. Ramalingam and A. Pfaltz, *Angew. Chem. Int. Ed.*, 2010, **49**, 6873–6876.
- 6 L. Ackermann and S. Barfüßer, *Synlett*, 2009, **2**, 0808–0812.
- 7 L. Ackermann and H. K. Potukuchi, *Synlett*, 2009, **1**, 2852–2856.
- 8 L. Ackermann, C. Wechsler, A. R. Kapdi and A. Althammer, *Synlett*, 2010, **2**, 294–298.
- 9 T. Achard, L. Giordano, A. Tenaglia, Y. Gimbert and G. Buono, *Organometallics*, 2010, **29**, 3936–3950.
- 10 D. Ghorai, V. Müller, H. Keil, D. Stalke, G. Zanoni, B. A. Tkachenko, P. R. Schreiner and L. Ackermann, *Adv. Synth. Catal.*, 2017, **359**, 3137–3141.
- 11 D. Ghorai, J. Loup, G. Zanoni and L. Ackermann, *Synlett*, 2019, **30**, 429–432.
- 12 A. Christiansen, D. Selent, A. Spannenberg, M. Köckerling, H. Reinke, W. Baumann, H. Jiao, R. Franke and A. Börner, *Chem. Eur. J.*, 2011, **17**, 2120–2129.
- 13 A. Christiansen, C. Li, M. Garland, D. Selent, R. Ludwig, R. Franke and A. Börner, *ChemCatChem*, 2010, **2**, 1278–1285.
- 14 1994.
- 15 C. Jiao, J. Zhuo, X. Chen, S. Li and H. Wang, *J. Therm. Anal. Calorim.*, 2013, **114**, 253–259.
- 16 Y. Guo, J. H. Hardesty, V. M. Mannari and J. L. Massingill, *JAOCs, J. Am. Oil Chem. Soc.*, 2007, **84**, 929–935.
- 17 C. S. Wang and C. Lin Hsuan, *J. Polym. Sci., Part A: Polym. Chem.*, 1999, **37**, 3903–3909.
- 18 C. B. Scott, *J. Org. Chem.*, 1957, **22**, 1118–1119.
- 19 R. Franke, D. Selent and A. Börner, *Chem. Rev.*, 2012, **112**, 5675–5732.
- 20 P. W. N. M. van Leeuwen and C. F. Roobeek, *J. Organomet. Chem.*, 1983, **258**, 343–350.
- 21 E. Billig, A. G. Abatjoglou, D. R. Bryant, R. E. Murray, J. M. Maher, (*Union Carbide Corporation*) *EP0155508A1*, **1985**.
- 22 A. J. Dennis, G. E. Harrison, J. P. Wyber, (*Davy Mckee (London) Limited*) *US4567306*, **1986**.
- 23 E. Billig, A. G. Abatjoglou, D. R. Bryant, (*Union Carbide Corporation*) *EP0214622A2*, **1987**.
- 24 E. Billig, A. G. Abatjoglou, D. R. Bryant, R. E. Murray, J. M. Maher, (*Union Carbide Corporation*) *US4717775*, **1988**.
- 25 T. Jongsma, P. Kimkes, G. Challa and P. W. N. M. van Leeuwen, *Polymer*, 1992, **33**, 161–165.

- 26 T. Jongsma, H. van Aert, M. Fossen, G. Challa and P. W. N. M. van Leeuwen, *J. Mol. Catal.*, 1993, **83**, 37–50.
- 27 G. D. Cuny and S. L. Buchwald, *J. Am. Chem. Soc.*, 1993, **115**, 2066–2068.
- 28 J. E. Babin, J. M. Maher, E. Billig, (*Union Carbide Corporation*) *US5364950A*, **1994**.
- 29 A. Van Rooy, P. C. J. Kamer, P. W. N. M. Van Leeuwen, K. Goubitz, J. Fraanje, N. Veldman and A. L. Spek, *Organometallics*, 1996, **15**, 835–847.
- 30 R. Paciello, L. Siggel, H. J. Kneuper, N. Walker and M. Röper, *J. Mol. Catal. A:Chem.*, 1999, **143**, 85–97.
- 31 M. Beller, B. Zimmermann and H. Geissler, *Chem. - Eur. J.*, 1999, **5**, 1301–1305.
- 32 A. Behr, D. Obst, C. Schulte and T. Schosser, *J. Mol. Catal. A:Chem.*, 2003, **206**, 179–184.
- 33 2003, **2**.
- 34 J. I. Van Der Vlugt, J. Ackerstaff, T. W. Dijkstra, A. M. Mills, H. Kooijman, A. L. Spek, A. Meetsma, H. C. L. Abbenhuis and D. Vogt, *Adv. Synth. Catal.*, 2004, **346**, 399–412.
- 35 A. Behr, G. Henze, D. Obst and B. Turkowski, *Green Chem.*, 2005, **7**, 645–649.
- 36 A. Behr, D. Obst and A. Westfechtel, *Eur. J. Lipid Sci. Technol.*, 2005, **107**, 213–219.
- 37 C. Vogl, E. Paetzold, C. Fischer and U. Kragl, *J. Mol. Catal. A:Chem.*, 2005, **232**, 41–44.
- 38 G. Ionescu, J. I. Van Der Vlugt, H. C. L. Abbenhuis and D. Vogt, *Tetrahedron:Asymmetry*, 2005, **16**, 3970–3975.
- 39 R. Jana and J. A. Tunge, *Org. Lett.*, 2009, **11**, 971–974.
- 40 D. Hess, D. Ortmann, O. Moeller, K.-D. Wiese, D. Fridag, W. Bueschken, (*Evonik Oxeno GmbH*) *US007495134B2*, **2009**.
- 41 M. Haumann, M. Jakuttis, R. Franke, A. Schönweiz and P. Wasserscheid, *ChemCatChem*, 2011, **3**, 1822–1827.
- 42 D. Selent, R. Franke, C. Kubis, A. Spannenberg, W. Baumann, B. Kreidler and A. Börner, *Organometallics*, 2011, **30**, 4509–4514.
- 43 C. J. Cobley and P. G. Pringle, *Catal. Sci. Technol.*, 2011, **1**, 239–242.
- 44 J. Fang, R. Jana, J. A. Tunge and B. Subramaniam, *Appl. Catal., A*, 2011, **393**, 294–301.
- 45 A. C. J. Koeken and N. M. B. Smeets, *Catal. Sci. Technol.*, 2013, **3**, 1036–1045.
- 46 Y. Brunsch and A. Behr, *Angew. Chem. Int. Ed.*, 2013, **52**, 1586–1589.
- 47 S. Güven, B. Hamers, R. Franke, M. Priske, M. Becker and D. Vogt, *Catal. Sci. Technol.*, 2014, **4**, 524–530.
- 48 A. Rost, Y. Brunsch, A. Behr and R. Schomäcker, *Chem. Eng. Technol.*, 2014, **37**, 1055–1064.
- 49 G. Kiedorf, D. M. Hoang, A. Müller, A. Jörke, J. Markert, H. Arellano-Garcia, A. Seidel-Morgenstern and C. Hamel, *Chem. Eng. Sci.*, 2014, **115**, 31–48.

- 50 K. McBride, T. Gaide, A. Vorholt, A. Behr and K. Sundmacher, *Chem. Eng. Process.*, 2015, **99**, 97–106.
- 51 A. Behr, A. Kämper, R. Kuhlmann, A. J. Vorholt and R. Franke, *Catal. Sci. Technol.*, 2015, **6**, 208–214.
- 52 S. Walter, M. Haumann, P. Wasserscheid, H. Hahn and R. Franke, *AIChE J.*, 2015, **61**, 893–897.
- 53 J. M. Dreimann, A. J. Vorholt, M. Skiborowski and A. Behr, *Chem. Eng. Trans.*, 2016, **47**, 343–348.
- 54 J. M. Dreimann, M. Skiborowski, A. Behr and A. J. Vorholt, *ChemCatChem*, 2016, **8**, 3330–3333.
- 55 M. Gerlach, D. Abdul Wajid, L. Hilfert, F. T. Edelman, A. Seidel-Morgenstern and C. Hamel, *Catal. Sci. Technol.*, 2017, **7**, 1465–1469.
- 56 T. Gaide, A. Jörke, K. E. Schlipköter, C. Hamel, A. Seidel-Morgenstern, A. Behr and A. J. Vorholt, *Appl. Catal., A*, 2017, **532**, 50–56.
- 57 L. Le Goanvic, J. Ternel, J.-L. Couturier, J.-L. Dubois and J.-F. Carpentier, *Catalysts*, 2018, **8**, 1–9.
- 58 A. Jörke, PhD thesis, Otto von Guericke Universität Magdeburg, 2018.
- 59 A. Lejeune, L. Le Goanvic, T. Renouard, J. L. Couturier, J. L. Dubois, J. F. Carpentier and M. Rabiller-Baudry, *Chempluschem*, 2019, **84**, 1744–1760.
- 60 M. Gerlach, F. Jameel, A. Seidel-Morgenstern, M. Stein and C. Hamel, *Catal. Sci. Technol.*, 2023, **13**, 1788–1801.
- 61 A. Bara-Estaún, C. L. Lyall, J. P. Lowe, P. G. Pringle, P. C. J. Kamer, R. Franke and U. Hintermair, *ChemCatChem*, 2023, **15**, <https://doi.org/10.1002/cctc.202201204>.
- 62 C. Kubis, M. König, B. N. Leidecker, D. Selent, H. Schröder, M. Sawall, W. Baumann, A. Spannenberg, A. Brächer, K. Neymeyer, F. Robert and A. Börner, *ACS Catal.*, 2023, **13**, 5245–5263.
